# Supplementary material for: Manipulation of the Structure and Optoelectronic Properties through Bromine Inclusion in a Layered Lead Bromide Perovskite
Source: PubMed Central journal article supplement (PMC10210243; doi:10.1021/acs.chemmater.2c03125), 2023-05-03
Supplement: cm2c03125_si_001.pdf [file cm2c03125_si_001.pdf]

# Supplementary information for

## Manipulation of structure and optoelectronic properties through bromine inclusion in a layered lead bromide perovskite

Lin-jie Yang<sup>1</sup>, Wenye Xuan<sup>2,3</sup>, David Webster<sup>4</sup>, Lethy Krishnan Jagadamma<sup>4</sup>, Teng Li<sup>1</sup>, David N. Miller,<sup>1</sup> David B. Cordes<sup>1</sup>, Alexandra M. Z. Slawin<sup>1</sup>, Graham A. Turnbull<sup>4</sup>, Ifor D. W. Samuel<sup>4</sup>, Hsin-Yi Tiffany Chen<sup>3</sup>, Philip Lightfoot<sup>1</sup>, Matthew S. Dyer<sup>2</sup>, Julia L. Payne<sup>1\*</sup>

<sup>1</sup>*School of Chemistry, University of St Andrews, North Haugh, St Andrews, Fife, KY16 9ST*

<sup>2</sup>*Department of Chemistry, University of Liverpool, Crown St, Liverpool, L69 7ZD and Materials Innovation Factory, University of Liverpool, 51 Oxford St, Liverpool, L7 3NY.*

<sup>3</sup>*Department of Engineering and System Science, National Tsing Hua University, Hsinchu 30013, Taiwan.*

<sup>4</sup>*School of Physics and Astronomy, University of St Andrews, North Haugh, St Andrews, Fife, KY16 9SS*

\*jlp8@st-andrews.ac.uk

**Table S 1: Refinement Details of Phase 2 and Phase3 of [H<sub>3</sub>N(CH<sub>2</sub>)<sub>6</sub>NH<sub>3</sub>]PbBr<sub>4</sub>**

| Sample                                                     | [H <sub>3</sub> N(CH <sub>2</sub> ) <sub>6</sub> NH <sub>3</sub> ]PbBr <sub>4</sub><br>Phase 2 | [H <sub>3</sub> N(CH <sub>2</sub> ) <sub>6</sub> NH <sub>3</sub> ]PbBr <sub>4</sub><br>Phase 3 |
|------------------------------------------------------------|------------------------------------------------------------------------------------------------|------------------------------------------------------------------------------------------------|
| CCDC Code                                                  | 2203749                                                                                        | 2203750                                                                                        |
| Formula                                                    | Pb <sub>3</sub> Br <sub>12</sub> C <sub>18</sub> N <sub>6</sub> H <sub>54</sub>                | Pb <sub>4</sub> Br <sub>16</sub> C <sub>24</sub> N <sub>8</sub> H <sub>72</sub>                |
| Formula Weight                                             | 645.05                                                                                         | 645.05                                                                                         |
| Crystal Description                                        | Colourless Prism                                                                               | Colourless Prism                                                                               |
| Crystal Size (mm <sup>3</sup> )                            | 0.05 x 0.05 x 0.05                                                                             | 0.08 x 0.05 x 0.03                                                                             |
| Temperature (K)                                            | 93                                                                                             | 298                                                                                            |
| Crystal System                                             | Monoclinic                                                                                     | Monoclinic                                                                                     |
| Space group                                                | <i>P2</i> <sub>1</sub>                                                                         | <i>P2</i> <sub>1</sub>                                                                         |
| <i>a</i> (Å)                                               | 16.601(11)                                                                                     | 16.382(7)                                                                                      |
| <i>b</i> (Å)                                               | 8.049(4)                                                                                       | 8.055(3)                                                                                       |
| <i>c</i> (Å)                                               | 17.329(11)                                                                                     | 24.680(10)                                                                                     |
| $\beta$ (deg)                                              | 97.702(12)                                                                                     | 107.187(11)                                                                                    |
| <i>V</i> (Å <sup>3</sup> )                                 | 2294.6(2)                                                                                      | 3111.3(2)                                                                                      |
| <i>Z</i>                                                   | 2                                                                                              | 2                                                                                              |
| $\rho_{\text{calc}}$ (g/cm <sup>3</sup> )                  | 2.801                                                                                          | 2.754                                                                                          |
| $\mu$ (mm <sup>-1</sup> )                                  | 21.446                                                                                         | 21.090                                                                                         |
| <i>F</i> (000)                                             | 1740                                                                                           | 2320                                                                                           |
| Reflections collected                                      | 27314                                                                                          | 21917                                                                                          |
| Independent reflections ( <i>R</i> <sub>int</sub> )        | 8316<br>(0.0508)                                                                               | 9721<br>(0.0656)                                                                               |
| Parameters, Restraints                                     | 221<br>22                                                                                      | 478<br>2354                                                                                    |
| Goodness-of-fit on <i>F</i> <sup>2</sup>                   | 1.023                                                                                          | 0.799                                                                                          |
| <i>R</i> <sub>1</sub>                                      | 0.0689                                                                                         | 0.1127                                                                                         |
| <i>R</i> <sub>1</sub> [ <i>l</i> >2 $\sigma$ ( <i>l</i> )] | 0.0398                                                                                         | 0.0520                                                                                         |
| <i>wR</i> <sub>2</sub>                                     | 0.0821                                                                                         | 0.1438                                                                                         |
| <i>wR</i> <sub>2</sub> [ <i>l</i> > $\sigma$ ( <i>l</i> )] | 0.0729                                                                                         | 0.1210                                                                                         |
| Largest diff. peak and hole (e/Å <sup>3</sup> )            | 2.132 and -2.255 e.Å <sup>-3</sup>                                                             | 1.944 and -2.624 e.Å <sup>-3</sup>                                                             |

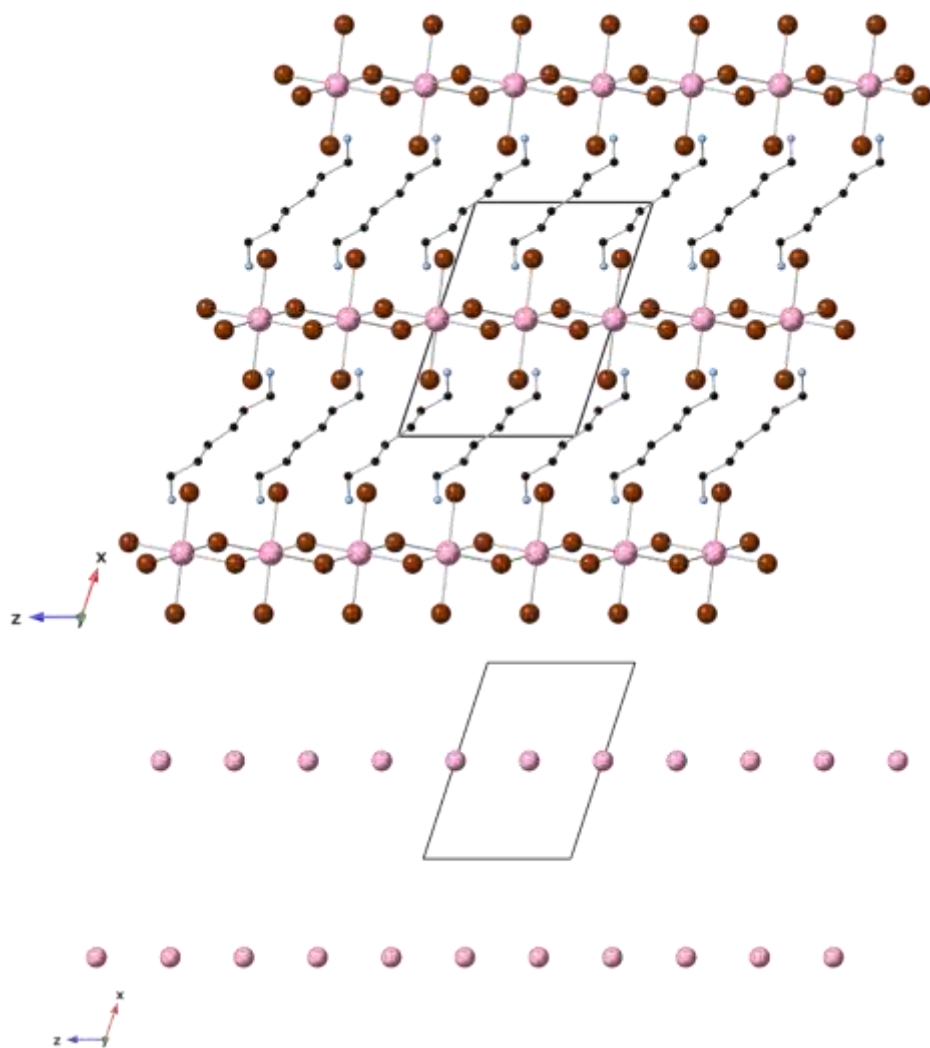

Figure S 1: Phase 1 of  $[\text{H}_3\text{N}(\text{CH}_2)_6\text{NH}_3]\text{PbBr}_4$ . The bottom image shows a representation of the Pb atoms only for comparison with Phases 2 and 3. Note the strictly 'flat' Pb layers.

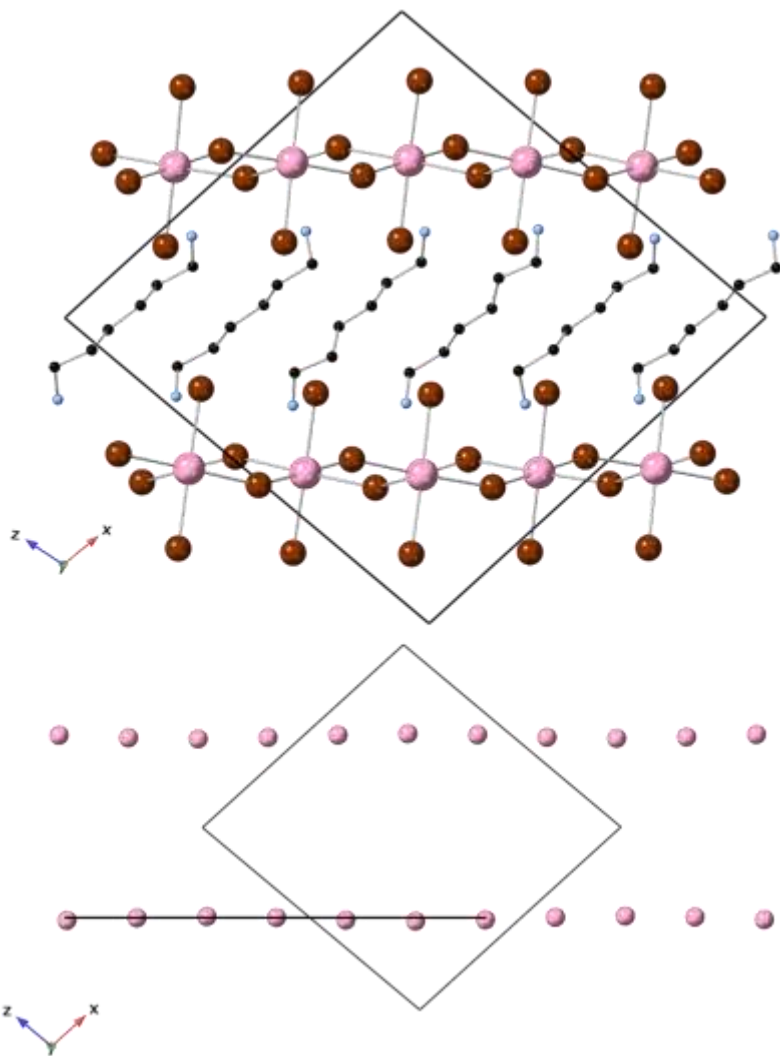

Figure S 2: Phase 2 of  $[\text{H}_3\text{N}(\text{CH}_2)_6\text{NH}_3]\text{PbBr}_4$ . Note the very slight undulation of the Pb layers, with a wavelength of six Pb centres.

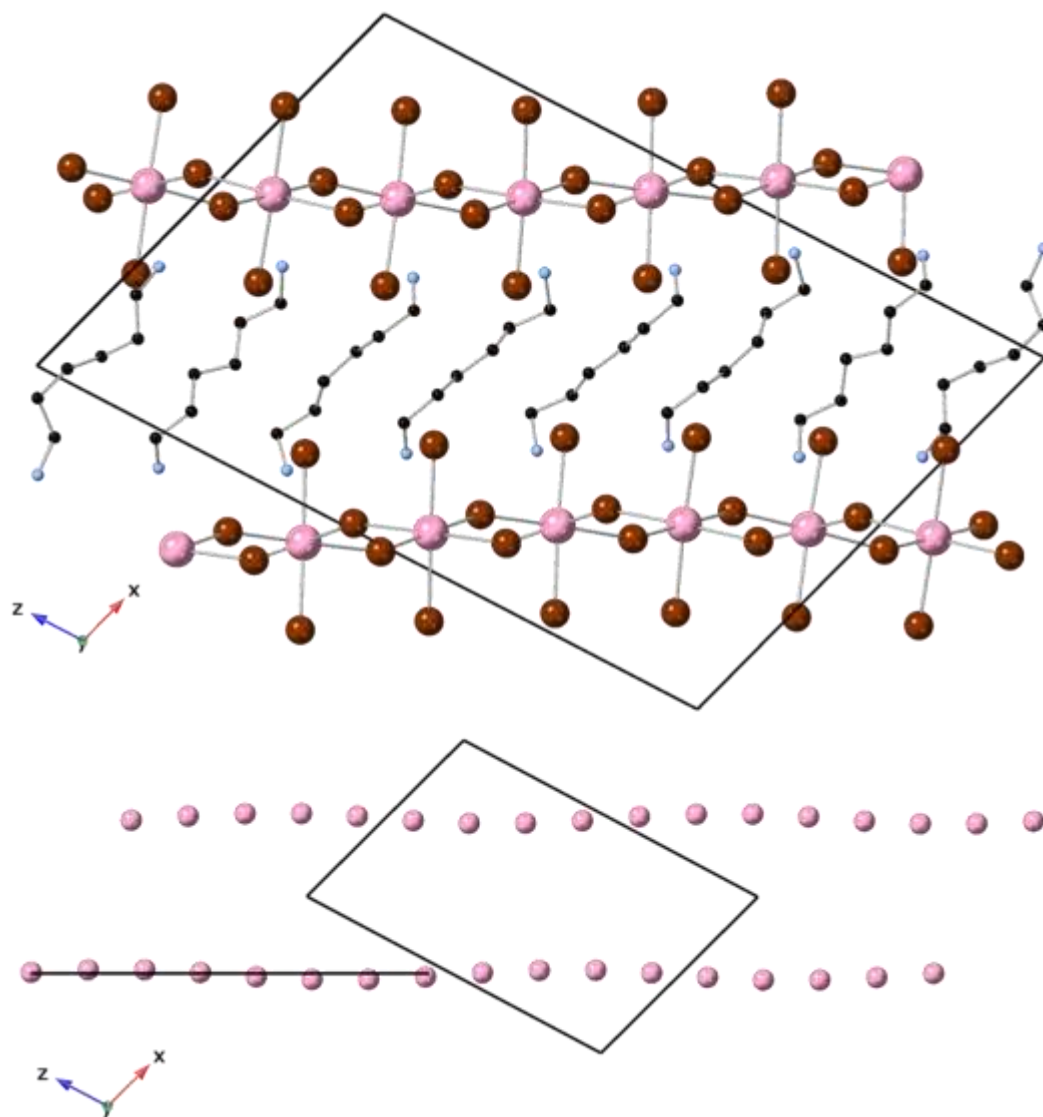

Figure S 3: Phase 3 of  $[\text{H}_3\text{N}(\text{CH}_2)_6\text{NH}_3]\text{PbBr}_4$ . Note the more significant undulation of the Pb layers, with a wavelength of eight Pb centres, and also the more significant variations in positioning of the amine moieties.

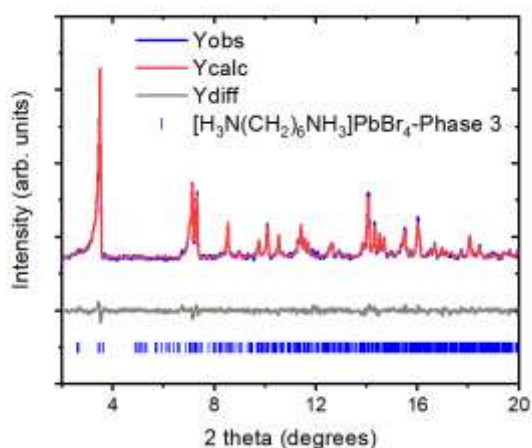

Figure S 4: Rietveld fit of laboratory PXRD data, collected at room temperature using MoK $\alpha_1$  radiation, before VT-PXRD experiment, which was carried out on [H<sub>3</sub>N(CH<sub>2</sub>)<sub>6</sub>NH<sub>3</sub>]PbBr<sub>4</sub>. Structural model for [H<sub>3</sub>N(CH<sub>2</sub>)<sub>6</sub>NH<sub>3</sub>]PbBr<sub>4</sub> Phase 3 was used in the refinement. Unit cell parameters are as follows:  $a = 16.3940(17)$  Å,  $b = 8.0510(8)$  Å,  $c = 24.691(2)$  Å,  $\beta = 107.159(7)^\circ$ .

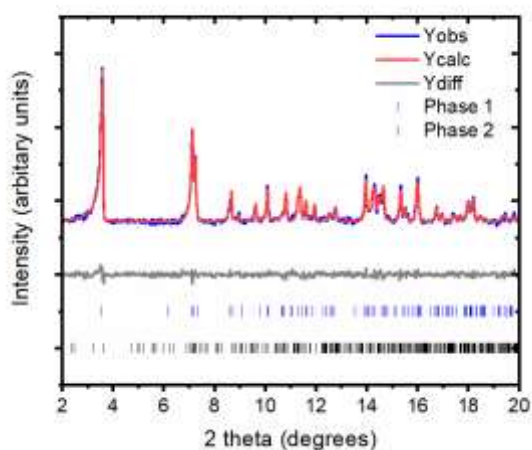

Figure S 5: Rietveld fit of laboratory PXRD data, collected at  $-50^\circ\text{C}$  using MoK $\alpha_1$  radiation, during VT-PXRD experiment, which was carried out on [H<sub>3</sub>N(CH<sub>2</sub>)<sub>6</sub>NH<sub>3</sub>]PbBr<sub>4</sub>. Structural model for [H<sub>3</sub>N(CH<sub>2</sub>)<sub>6</sub>NH<sub>3</sub>]PbBr<sub>4</sub> Phase 1 and Phase 2 was used in the refinement. Unit cell parameters for Phase 1 are  $a = 11.879(5)$  Å,  $b = 8.047(4)$  Å,  $c = 8.351(4)$  Å and  $\beta = 105.85(5)^\circ$  whilst the unit cell parameters for Phase 2 are  $a = 16.537(2)$  Å,  $b = 8.0494(8)$  Å,  $c = 17.4063(18)$  Å and  $\beta = 96.715(7)^\circ$ .

The SEM image of [H<sub>3</sub>N(CH<sub>2</sub>)<sub>6</sub>NH<sub>3</sub>]PbBr<sub>4</sub> is shown in Figure S 6, which shows that [H<sub>3</sub>N(CH<sub>2</sub>)<sub>6</sub>NH<sub>3</sub>]PbBr<sub>4</sub> has adopted a predominantly square prismatic morphology, with dimensions of around 300-400  $\mu\text{m}$  and a thickness of approximately 50  $\mu\text{m}$ . EDS found the Pb: Br ratio to be 20.71 (0.10): 79.29 (0.36), giving a Pb: Br ratio of 1: 3.83, which is within experimental error of the expected 1:4 Pb:Br ratio in the de-intercalated sample.

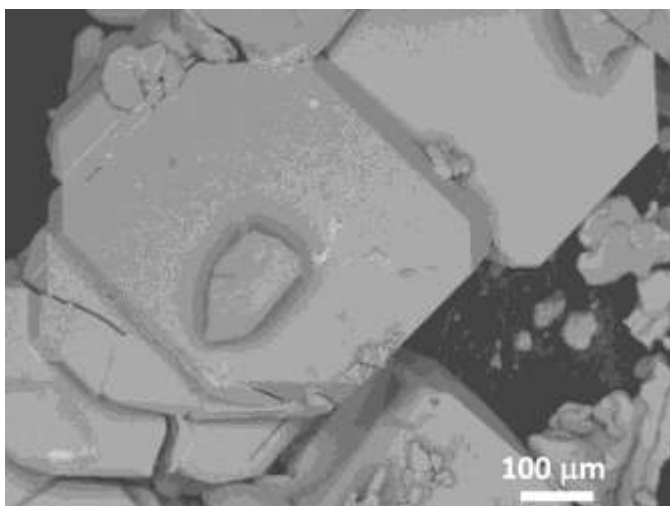

**Figure S 6: SEM image of  $[\text{H}_3\text{N}(\text{CH}_2)_6\text{NH}_3]\text{PbBr}_4$**

The SEM image of  $[\text{H}_3\text{N}(\text{CH}_2)_6\text{NH}_3]\text{PbBr}_4 \cdot \text{Br}_2$  is shown in Figure S7. Like  $[\text{H}_3\text{N}(\text{CH}_2)_6\text{NH}_3]\text{PbBr}_4$ , the morphology adopted is square prismatic, with dimensions of around 600-800  $\mu\text{m}$ .

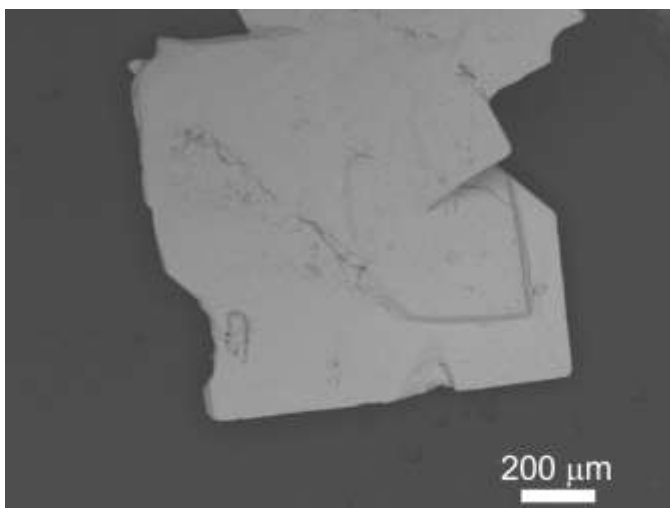

**Figure S 7: SEM image of  $[\text{H}_3\text{N}(\text{CH}_2)_6\text{NH}_3]\text{PbBr}_4 \cdot \text{Br}_2$**

Table S 1: Pb-Br bond lengths and octahedral distortions for [H<sub>3</sub>N(CH<sub>2</sub>)<sub>6</sub>NH<sub>3</sub>]PbBr<sub>4</sub> and [H<sub>3</sub>N(CH<sub>2</sub>)<sub>6</sub>NH<sub>3</sub>]PbBr<sub>4</sub>.Br<sub>2</sub>

|                            | [ H <sub>3</sub> N(CH <sub>2</sub> ) <sub>6</sub> NH <sub>3</sub> ]PbBr <sub>4</sub> .Br <sub>2</sub><br>LT | [ H <sub>3</sub> N(CH <sub>2</sub> ) <sub>6</sub> NH <sub>3</sub> ]PbBr <sub>4</sub> .Br <sub>2</sub><br>RT |
|----------------------------|-------------------------------------------------------------------------------------------------------------|-------------------------------------------------------------------------------------------------------------|
|                            | Pb1                                                                                                         | Pb1                                                                                                         |
| Pb-Br (Å)                  | 2.9623(8)                                                                                                   | 2.9665(8)                                                                                                   |
|                            | 2.9623(8)                                                                                                   | 2.9666(8)                                                                                                   |
|                            | 2.9640(7)                                                                                                   | 2.9771(8)                                                                                                   |
|                            | 2.9640(7)                                                                                                   | 2.9771(8)                                                                                                   |
|                            | 2.9672(8)                                                                                                   | 2.9790(8)                                                                                                   |
|                            | 2.9672(8)                                                                                                   | 2.9790(8)                                                                                                   |
| Br-Pb-Br<br>range<br>(deg) | 87.247(9)<br>-<br>92.753(9)                                                                                 | 87.332(10)<br>-<br>92.667(10)                                                                               |
| Pb-Br-Pb<br>(deg)          | 180.0                                                                                                       | 180.0                                                                                                       |
|                            | 180.0                                                                                                       | 180.0                                                                                                       |
|                            | 180.0                                                                                                       | 180.0                                                                                                       |
| Δd (×10 <sup>-6</sup> )    | 0.47                                                                                                        | 3.39                                                                                                        |
| σ <sup>2</sup>             | 3.43                                                                                                        | 3.35                                                                                                        |

|                         | [ H <sub>3</sub> N(CH <sub>2</sub> ) <sub>6</sub> NH <sub>3</sub> ]PbBr <sub>4</sub><br>Phase 2 |            |            | [ H <sub>3</sub> N(CH <sub>2</sub> ) <sub>6</sub> NH <sub>3</sub> ]PbBr <sub>4</sub><br>Phase 3 |            |            |            |
|-------------------------|-------------------------------------------------------------------------------------------------|------------|------------|-------------------------------------------------------------------------------------------------|------------|------------|------------|
|                         | Pb1                                                                                             | Pb2        | Pb3        | Pb1                                                                                             | Pb2        | Pb3        | Pb4        |
| Pb-Br (Å)               | 2.9868(9)                                                                                       | 2.9783(10) | 2.9937(12) | 2.9724(13)                                                                                      | 2.9717(14) | 2.9957(19) | 2.9694(17) |
|                         | 2.9939(9)                                                                                       | 2.9851(10) | 3.0073(11) | 2.9856(15)                                                                                      | 2.9883(15) | 3.0048(16) | 3.0050(16) |
|                         | 3.0300(9)                                                                                       | 3.0358(10) | 3.0324(11) | 2.9969(14)                                                                                      | 2.9920(17) | 3.0063(16) | 3.0058(16) |
|                         | 3.0362(9)                                                                                       | 3.0386(10) | 3.0352(11) | 2.9988(14)                                                                                      | 2.9953(15) | 3.0091(18) | 3.0081(16) |
|                         | 3.0461(9)                                                                                       | 3.0438(10) | 3.0357(10) | 3.0242(14)                                                                                      | 3.0199(14) | 3.0118(18) | 3.0117(17) |
|                         | 3.0469(9)                                                                                       | 3.0469(10) | 3.0510(10) | 3.0258(15)                                                                                      | 3.0300(14) | 3.0126(18) | 3.0248(17) |
| Br-Pb-Br range<br>(deg) | 85.63(2)                                                                                        | 86.30(3)   | 86.16(3)   | 87.18(4)                                                                                        | 87.07(4)   | 86.64(5)   | 86.76(4)   |
|                         | -                                                                                               | -          | -          | -                                                                                               | -          | -          | -          |
|                         | 94.43(2)                                                                                        | 94.48(3)   | 94.31(3)   | 93.73(4)                                                                                        | 93.62(4)   | 93.54(5)   | 93.38(5)   |
| Pb-Br-Pb (deg)          | 178.60(3)                                                                                       | 179.01(3)  | 179.09(4)  | 177.03(5)                                                                                       | 177.06(5)  | 179.48(6)  | 178.85(6)  |
|                         | 178.48(2)                                                                                       | 179.20(3)  | 179.00(3)  | 178.21(4)                                                                                       | 178.36(4)  | 178.15(6)  | 178.94(4)  |
|                         | 178.07(2)                                                                                       | 178.96(3)  | 178.82(3)  | 178.16(4)                                                                                       | 177.77(4)  | 178.26(5)  | 178.59(5)  |
| Δd (×10 <sup>-6</sup> ) | 63.50                                                                                           | 88.20      | 40.70      | 41.30                                                                                           | 42.90      | 3.53       | 31.60      |
| σ <sup>2</sup>          | 8.69                                                                                            | 9.47       | 7.44       | 5.00                                                                                            | 5.08       | 4.82       | 4.03       |



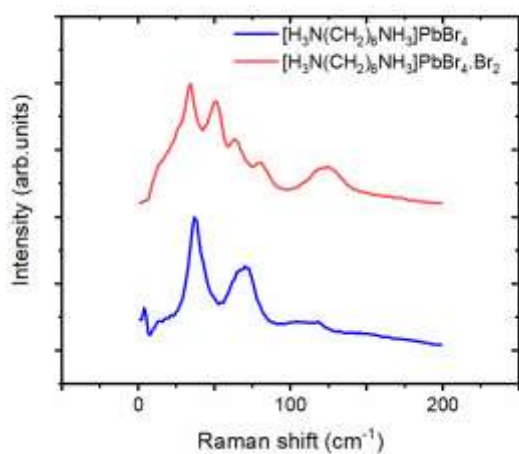

Figure S 8: Raman spectra of  $[\text{H}_3\text{N}(\text{CH}_2)_6\text{NH}_3]\text{PbBr}_4$  and  $[\text{H}_3\text{N}(\text{CH}_2)_6\text{NH}_3]\text{PbBr}_4 \cdot \text{Br}_2$

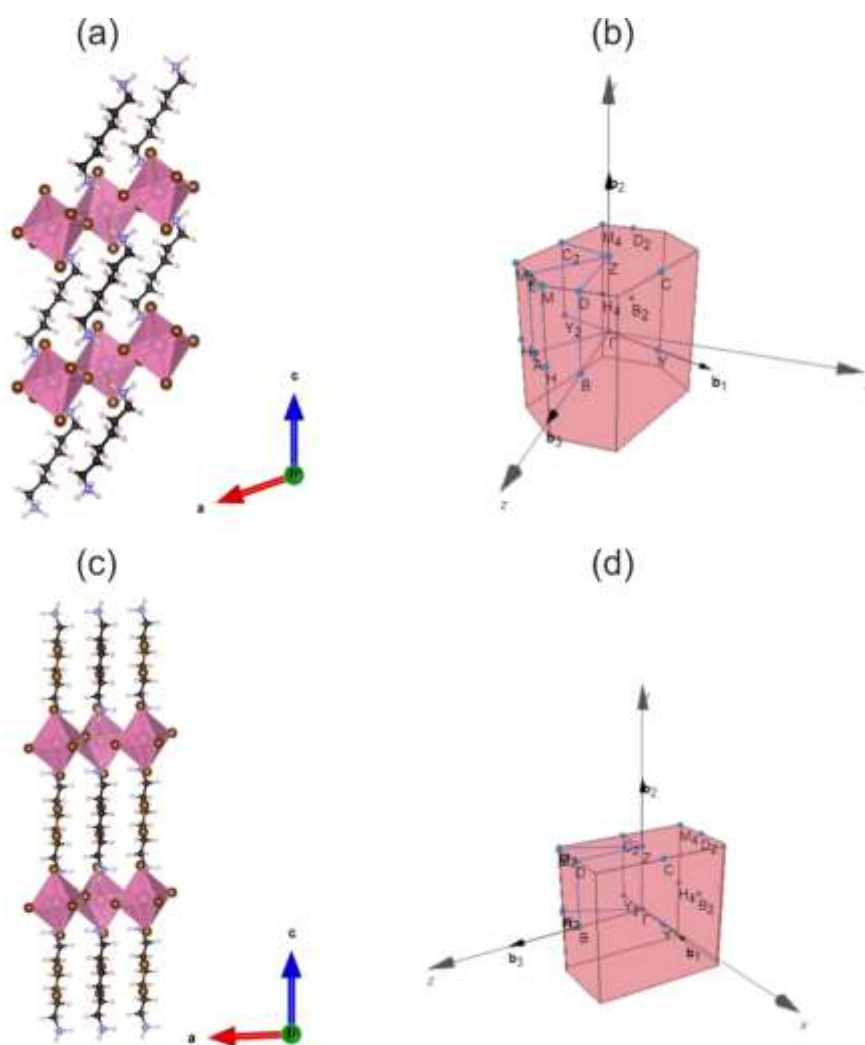

Figure S 9: Computational crystal structure model and Brillouin zone with high symmetry points of  $[\text{H}_3\text{N}(\text{CH}_2)_6\text{NH}_3]\text{PbBr}_4$  (a, b) and  $[\text{H}_3\text{N}(\text{CH}_2)_6\text{NH}_3]\text{PbBr}_4 \cdot \text{Br}_2$  (c, d)

## Stability studies

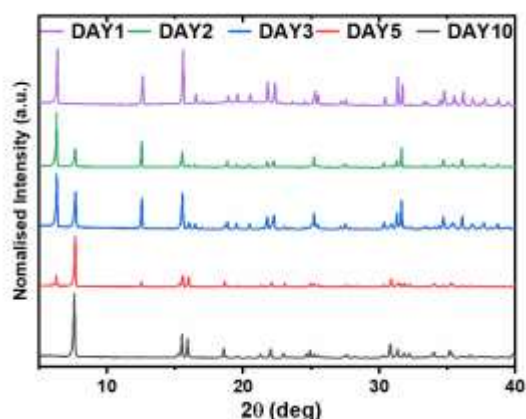

Figure S 10: PXRD patterns of  $[\text{H}_3\text{N}(\text{CH}_2)_6\text{NH}_3]\text{PbBr}_4\cdot\text{Br}_2$  collected at room temperature over ten days.

In order to probe the stability of  $[\text{H}_3\text{N}(\text{CH}_2)_6\text{NH}_3]\text{PbBr}_4\cdot\text{Br}_2$ , powder X-ray diffraction patterns were collected at room temperature over the course of 10 days (see Figure S10). On day 1, PXRD show that the sample consisted of phase pure  $[\text{H}_3\text{N}(\text{CH}_2)_6\text{NH}_3]\text{PbBr}_4\cdot\text{Br}_2$ , with no evidence of  $[\text{H}_3\text{N}(\text{CH}_2)_6\text{NH}_3]\text{PbBr}_4$ . On day 2, extra peaks appeared in the diffraction pattern which could be indexed to the deintercalated  $[\text{H}_3\text{N}(\text{CH}_2)_6\text{NH}_3]\text{PbBr}_4$  Phase 3, but this phase was the minor phase. The phase fraction of  $[\text{H}_3\text{N}(\text{CH}_2)_6\text{NH}_3]\text{PbBr}_4$  continued to increase even further and on day 10 showed no evidence of  $[\text{H}_3\text{N}(\text{CH}_2)_6\text{NH}_3]\text{PbBr}_4\cdot\text{Br}_2$  at all. The unit cell parameters of  $[\text{H}_3\text{N}(\text{CH}_2)_6\text{NH}_3]\text{PbBr}_4$  and  $[\text{H}_3\text{N}(\text{CH}_2)_6\text{NH}_3]\text{PbBr}_4\cdot\text{Br}_2$  do not change significantly over time and we have not seen any evidence of ordered phases with bromine and bromine vacancies. In terms of stability, this is better than  $(\text{BA})_2\text{PbI}_4\cdot\text{I}_2$  which full reverted to  $(\text{BA})_2\text{PbI}_4$  24hrs after intercalation.<sup>1</sup>

In order to probe the influence of temperature on the long term stability of  $[\text{H}_3\text{N}(\text{CH}_2)_6\text{NH}_3]\text{PbBr}_4\cdot\text{Br}_2$ , samples of  $[\text{H}_3\text{N}(\text{CH}_2)_6\text{NH}_3]\text{PbBr}_4\cdot\text{Br}_2$  were stored in the refrigerator at 5 °C for 21 days. The sample was taken out of the refrigerator in order to collect PXRD data at room temperature. The PXRD data collected on day 1 and after 21 days in the refrigerator is shown in Figure S11. No peaks corresponding to the parent  $[\text{H}_3\text{N}(\text{CH}_2)_6\text{NH}_3]\text{PbBr}_4$  material or any other impurities were observed. Therefore, the PXRD studies have shown that the  $[\text{H}_3\text{N}(\text{CH}_2)_6\text{NH}_3]\text{PbBr}_4\cdot\text{Br}_2$  is stable when kept in the refrigerator for at least 21 days.

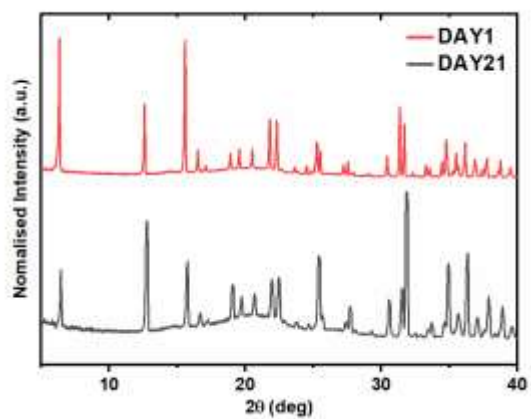

Figure S 11: Powder X-ray diffraction pattern of  $[\text{H}_3\text{N}(\text{CH}_2)_6\text{NH}_3]\text{PbBr}_4 \cdot \text{Br}_2$  after storing for 1 day and 21 days in the refrigerator at approximately 3 to 5 °C

1. T. Sheikh, V. Nawale, N. Pathoor, C. Phadnis, A. Chowdhury and A. Nag, *Angew. Chem. Int. Edit.*, 2020, **59**, 11653-11659.
